# Supplementary material for: Boronate self-assemblies with embedded Au nanoparticles: preparation, characterization and their catalytic activities for the reduction of nitroaromatic compounds
Source: Royal Society of Chemistry journal article supplement (doi:10.1039/c2jm34797k), 2012-01-01
Supplement: c2jm34797k.pdf [file c2jm34797k.pdf]

**Electronic Supplementary Information for**

**Boronate self-assembles with embedded Au nanoparticles; preparation, characterization and their catalytic activities for the reduction of nitroaromatic compounds**

Yusuke Matsushima,<sup>a</sup> Ryuhei Nishiyabu,<sup>a</sup> Naoto Takanashi,<sup>a</sup> Masatake Haruta,<sup>a</sup> Hideaki Kimura,<sup>b</sup> and Yuji Kubo\*<sup>a</sup>

<sup>a</sup>*Department of Applied Chemistry, Graduate School of Urban Environmental Science, Tokyo Metropolitan University, Minami-ohsawa, Hachioji, Tokyo 192-0397, Japan*

<sup>b</sup>*BrukerBioSpin K. K., 3-9, Moriya-cho, Kanagawa-ku, Yokohama-shi, Kanagawa 221-0022, Japan.*

\*Corresponding Author: Yuji Kubo, yujik@tmu.ac.jp

### Synthesis of Au/SiO<sub>2</sub> hybrids

Au/SiO<sub>2</sub> catalysts were prepared according to the procedure reported by Corma et al.<sup>1</sup> 10 mL of ethanol solution containing the dispersed capped Au NPs were added to a solution formed by 1.85 mL of TEOS (tetra-ethyl-ortho-silicate) and 0.25 mL of H<sub>2</sub>O. The hydrolysis was catalysed by 0.6 mL of an aqueous solution of NH<sub>4</sub>F (0.045 M). The sol under continuous stirring became in tens of minutes a gel that slowly converted in a white, slightly yellow powder. The powder was finally dried overnight at 450 °C. In this way, 474 mg of Au/SiO<sub>2</sub> catalysts was obtained. The amount of loaded Au was 1.6 wt%, determined by ICP-AES. For the characterization, the TEM micrograph and histogram of the particle size distribution are shown in Fig. S1.

1. G. Budroni and A. Corma, *Angew. Chem. Int. Ed.*, 2006, **45**, 3328–3331.

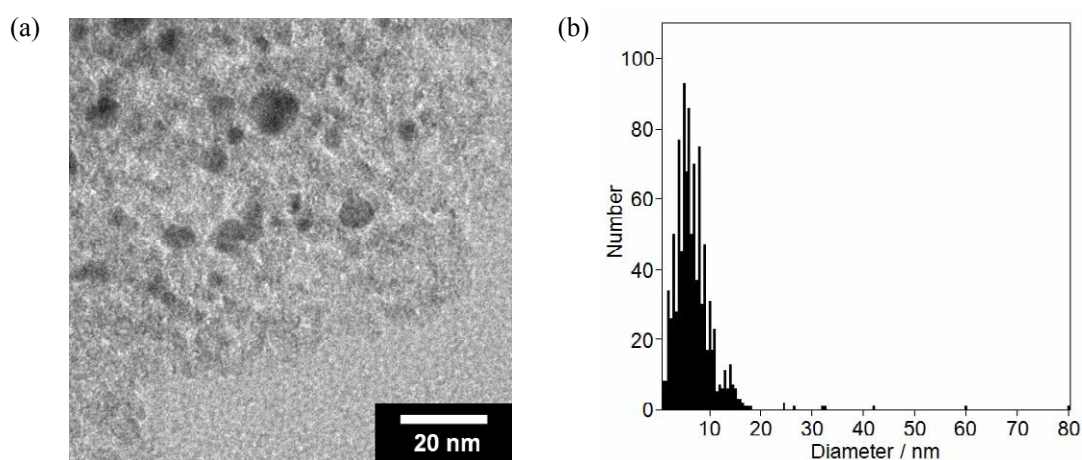

**Fig. S1** (a) The TEM image and (b) the particle size distribution of Au/SiO<sub>2</sub>.

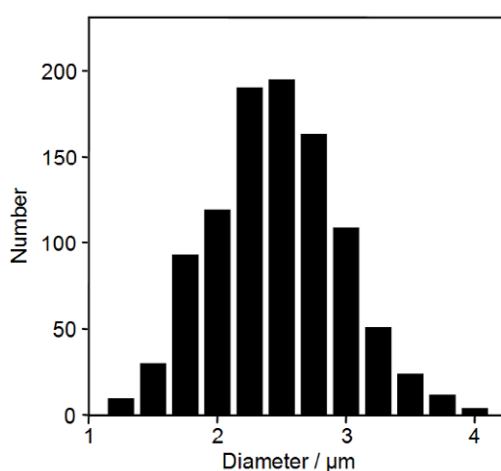

**Fig. S2** The size distribution of boronate microparticles BP.

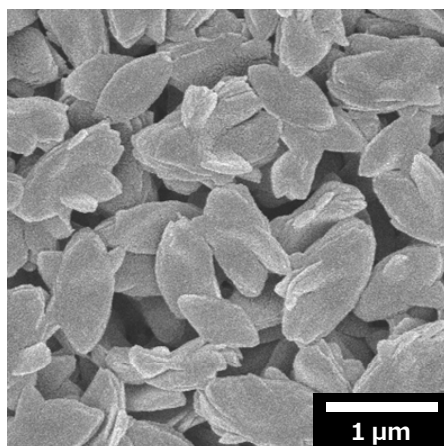

**Fig. S3** FE-SEM image of boronate ester polymers prepared from **1** ( $5.0 \times 10^{-2}$  mmol) and **2** ( $5.0 \times 10^{-2}$  mmol) in DMSO (5 mL) at room temperature for 5h.

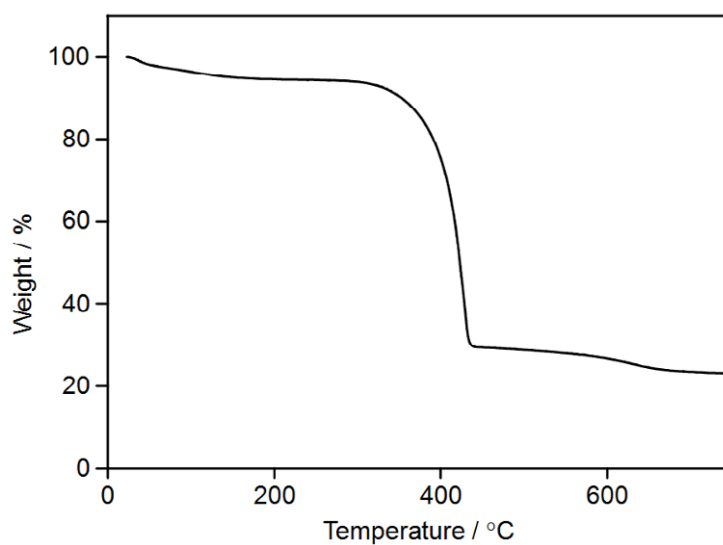

**Fig. S4** Thermogravigram (TG) curve of **BP**. The graph shows the loss of mass as a function of temperature. Conditions: nitrogen atmosphere and heating rate of  $5^{\circ}\text{C min}^{-1}$  in the temperature range of 22.7–878.2°C.

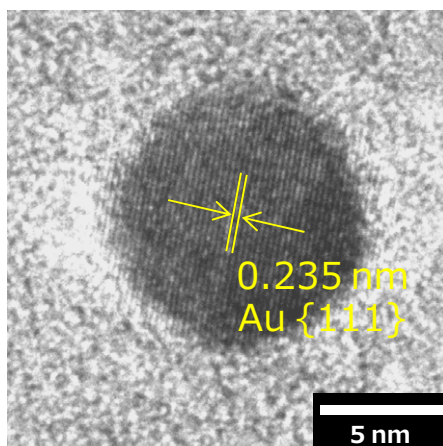

**Fig. S5** HR-TEM image of Au NP deposited on Au-BP(SG) by solid gridding (SG) method.

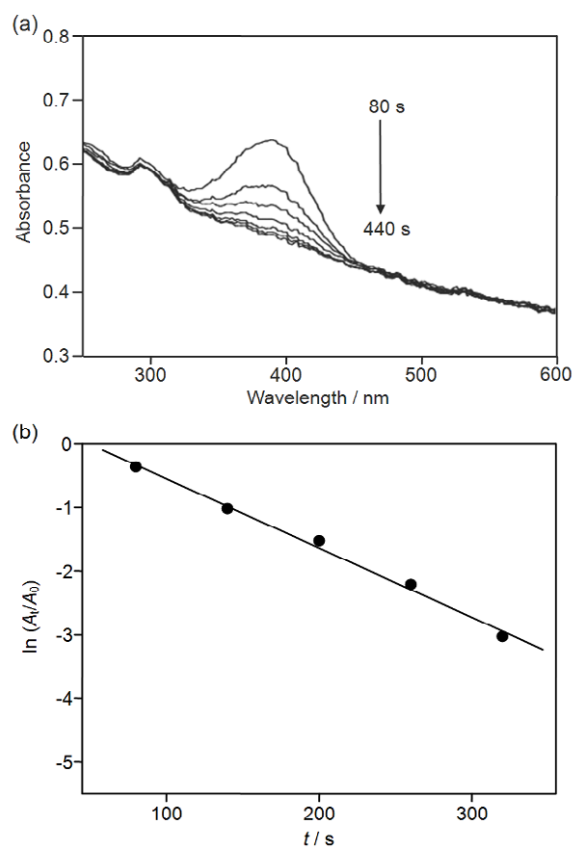

**Fig. S6** (a) UV/vis absorption spectra for the reduction of 4-NP with NaBH<sub>4</sub> over Au-BP(SG) in methanol at 25 °C. The base line was normalized due to a slight precipitation during the reaction. (b) Plot of  $\ln(A_t/A_0)$  versus time for the reduction of 4-NP. Reaction condition, [Au] =  $7.1 \times 10^{-5}$  M, [4-NP] =  $1.3 \times 10^{-4}$  M, and [NaBH<sub>4</sub>] =  $1.8 \times 10^{-2}$  M.

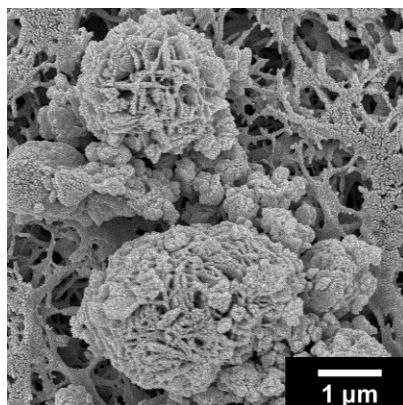

**Fig. S7** FE-SEM image of **Au-BP(SG)**.

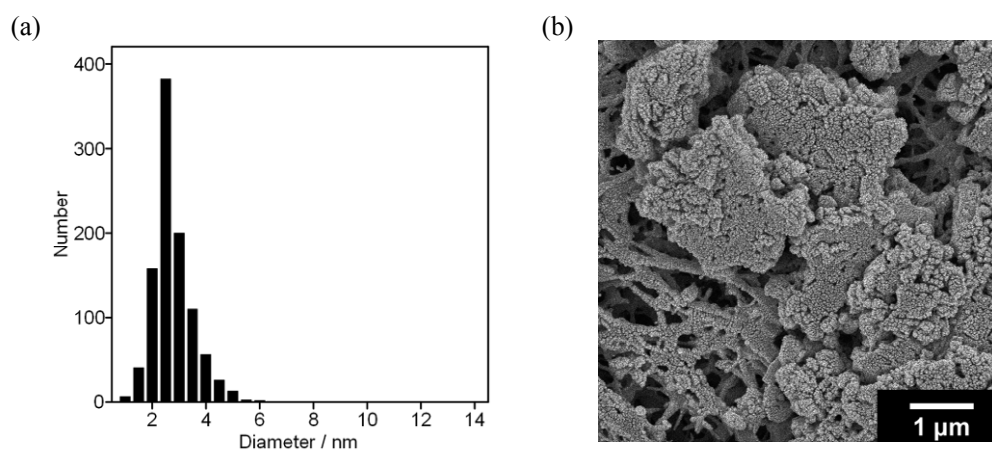

**Fig. S8** (a) Size distribution of Au NPs, being based on TEM image, for **Au-BP(DR)** after the second run for the hydrogenation. The average diameter was determined to be  $2.8 \pm 0.6$  nm. (b) FE-SEM image for **Au-BP(DR)** after the second run for the hydrogenation.

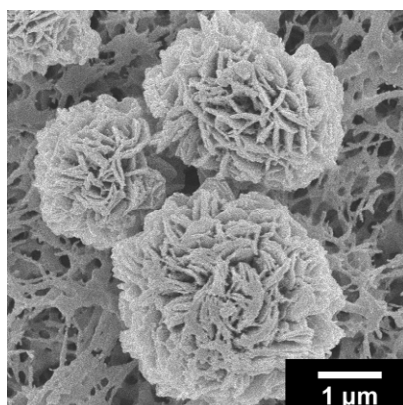

**Fig. S9** FE-SEM image of **Au-BP(DR)** after five successive runs for reduction of 4-NP with  $\text{NaBH}_4$  in methanol.
